# Supplementary material for: Survey of Danish Head and Neck Cancer Patients’ Positions on Personalized Medicine, Gene Tests, and Personalized Follow-Up
Source: MDPI journal article supplement (doi:10.3390/jpm14040404), 2024-04-11

### Supplementary material 3 (S3)

Bar Charts Showing the Distribution of Answers from the 177 Patients with Complete Data.

1)

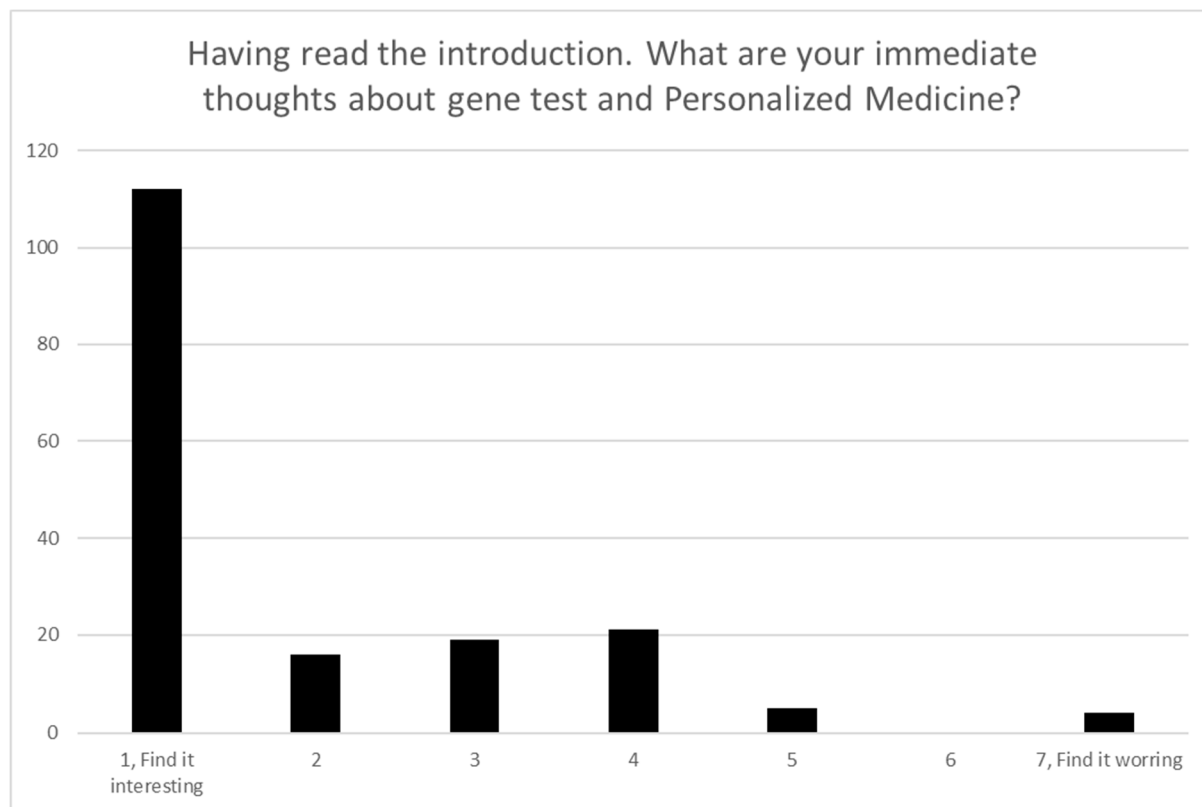

2)

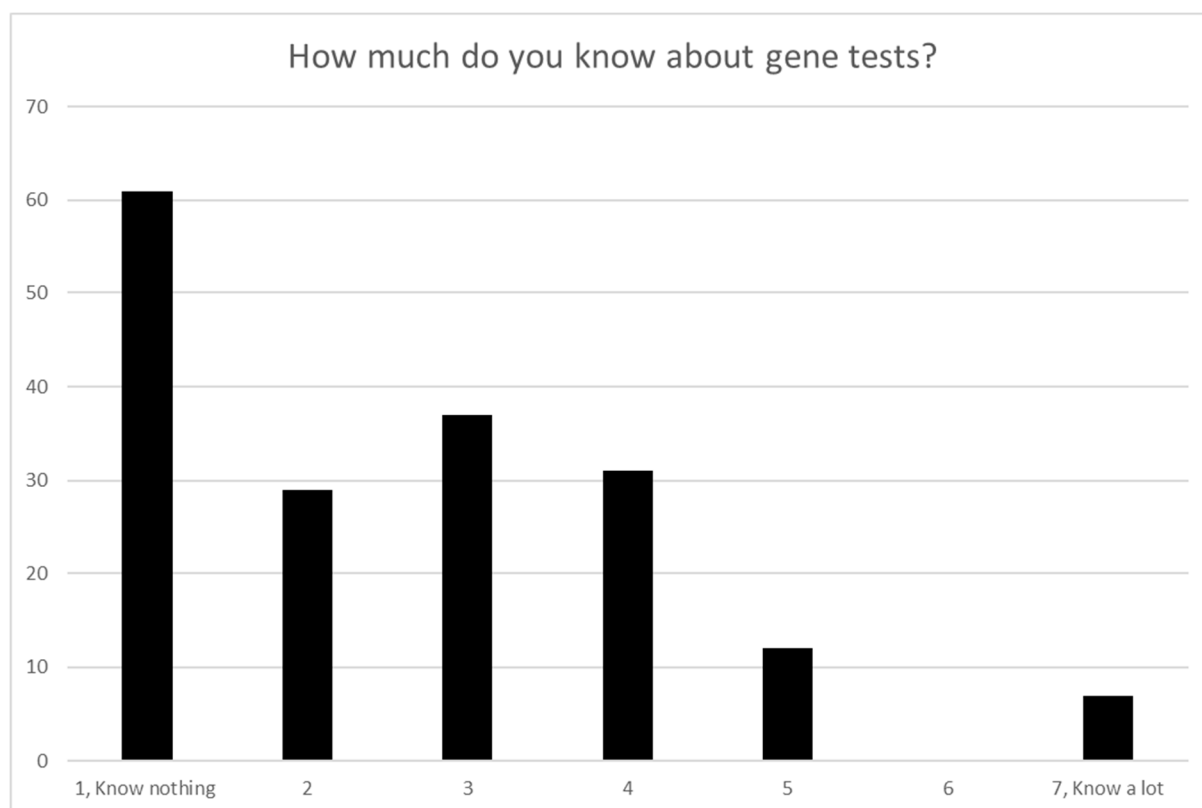

3)

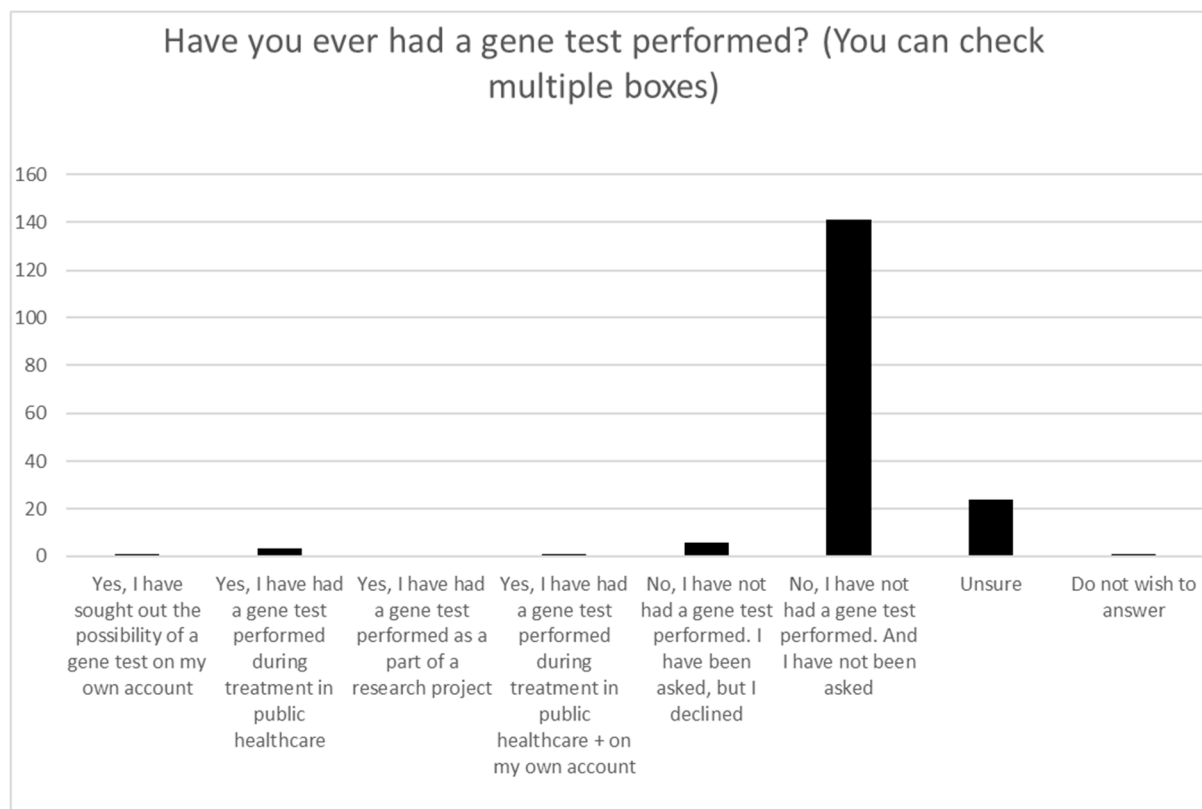

4)

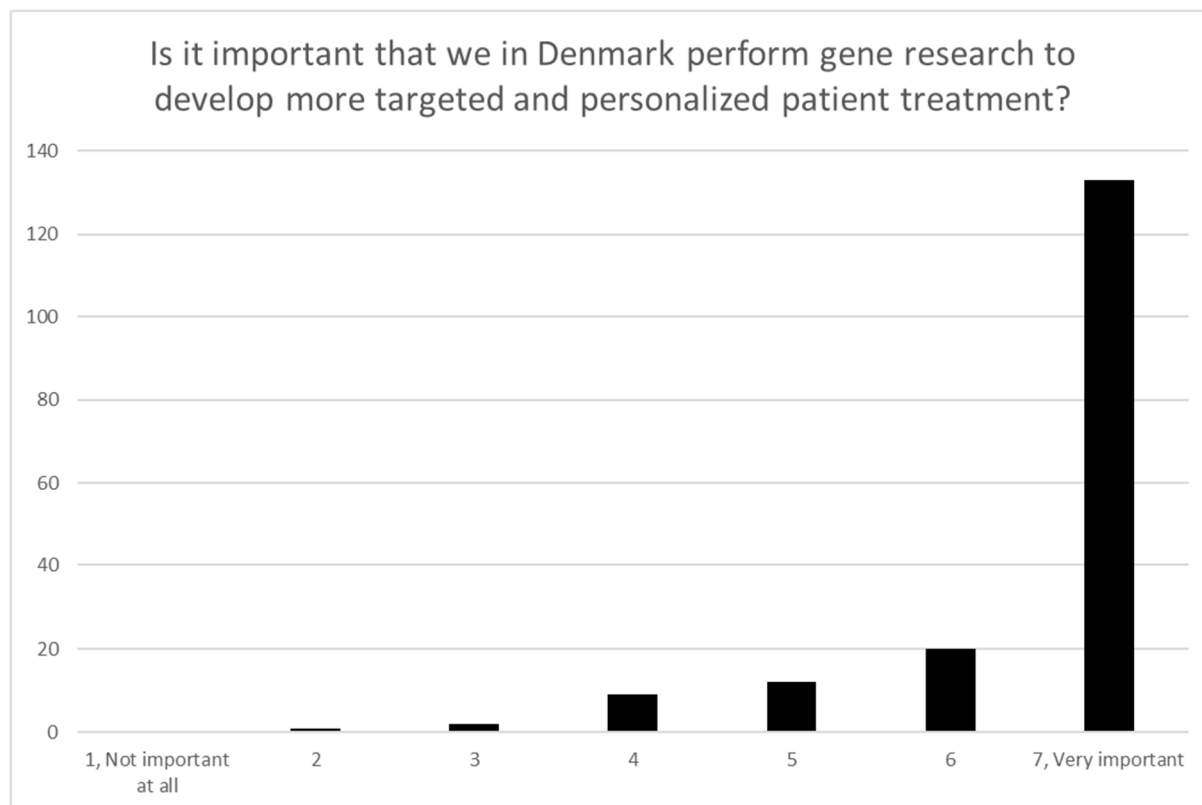

5)

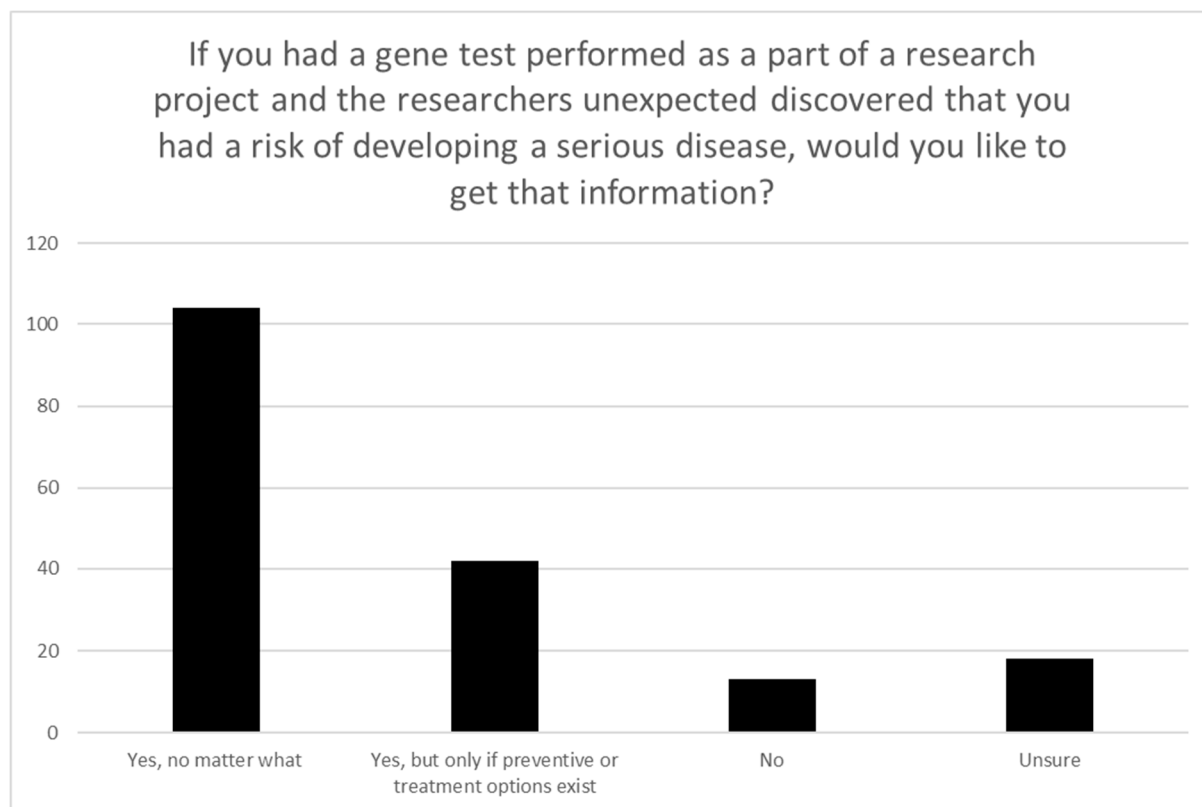

6)

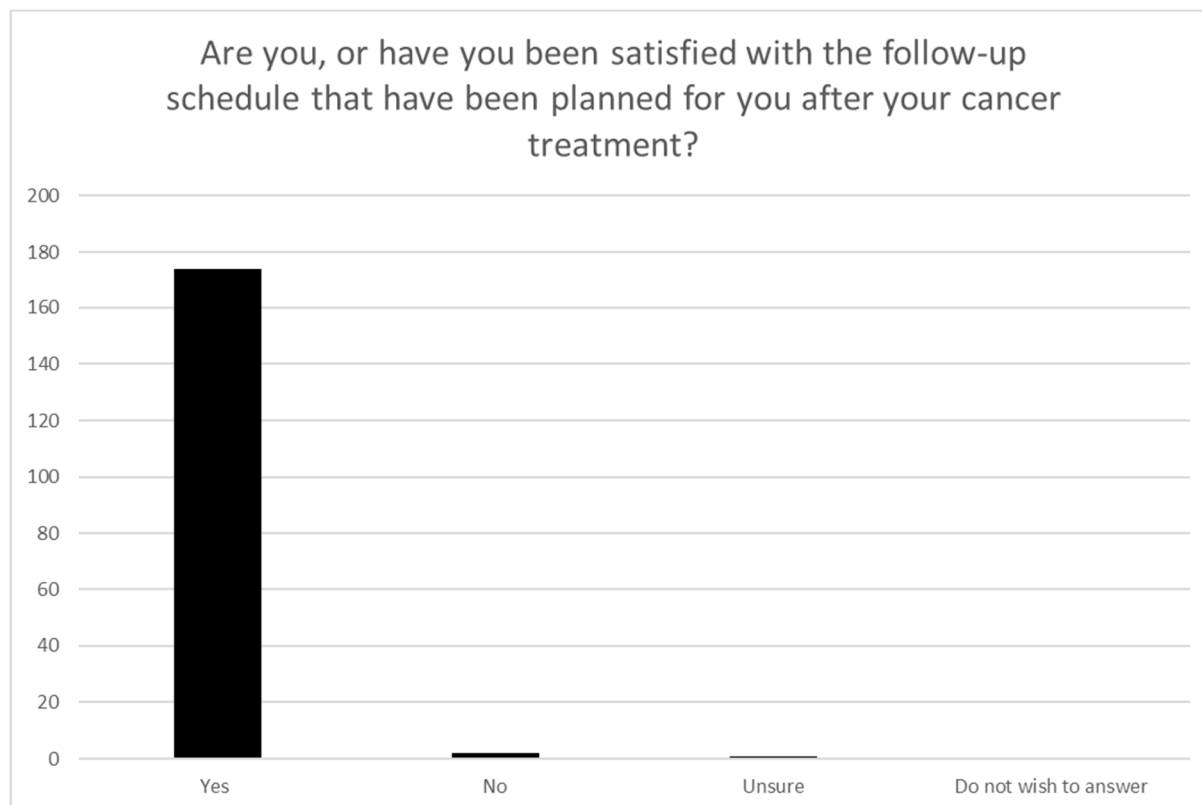

7)

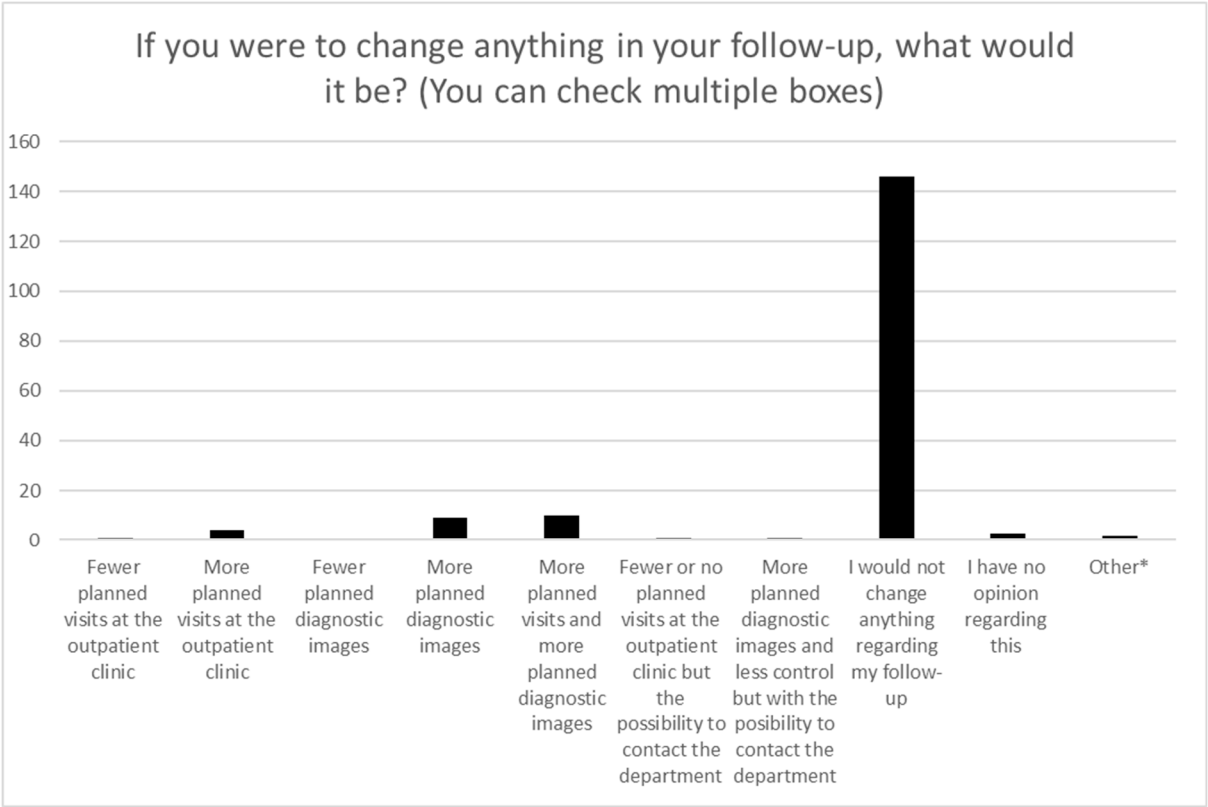

\* One proposed longer follow-up period and one wanted better doctors.

8)

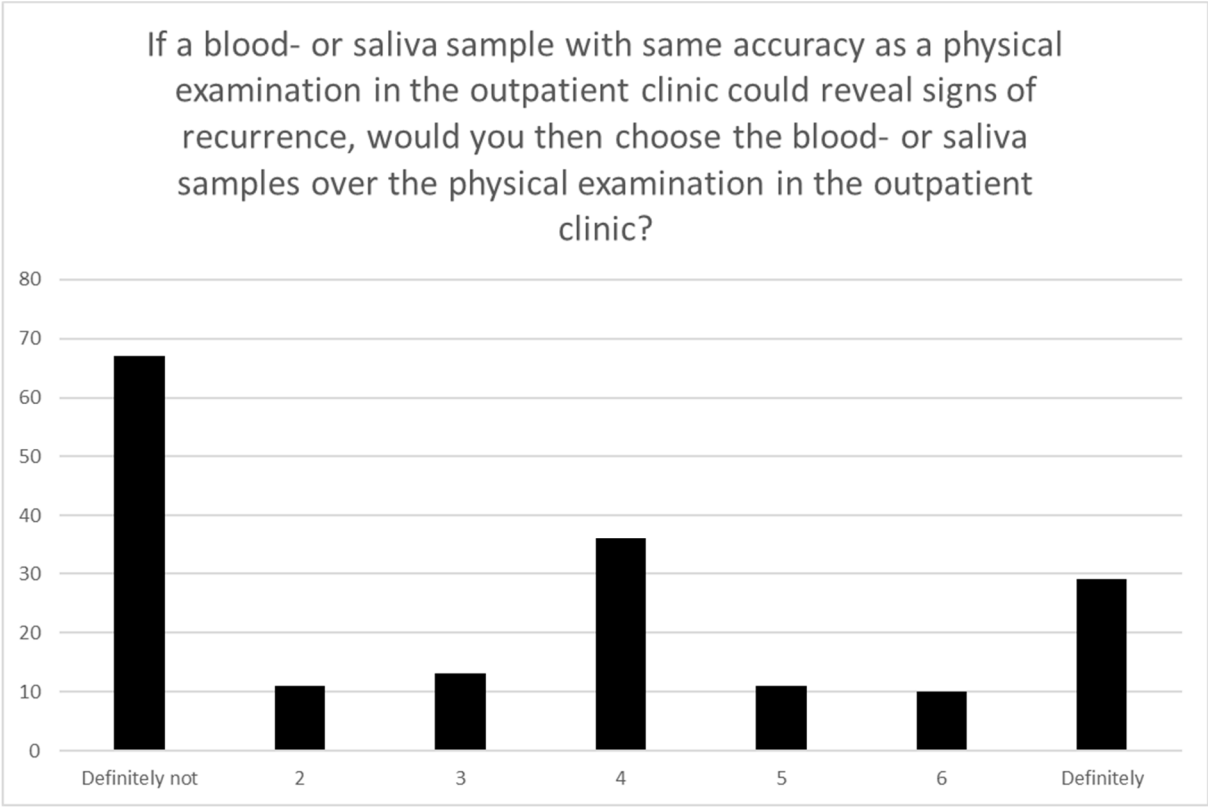

9)

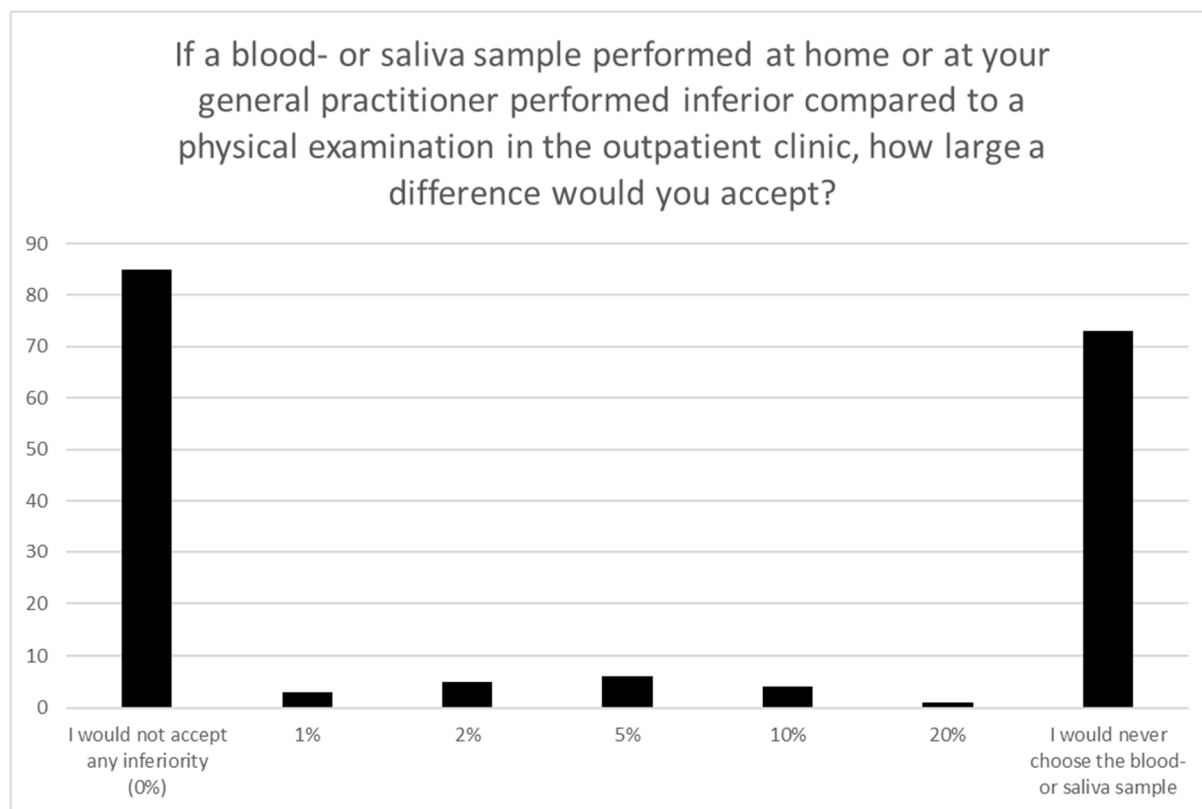

10)

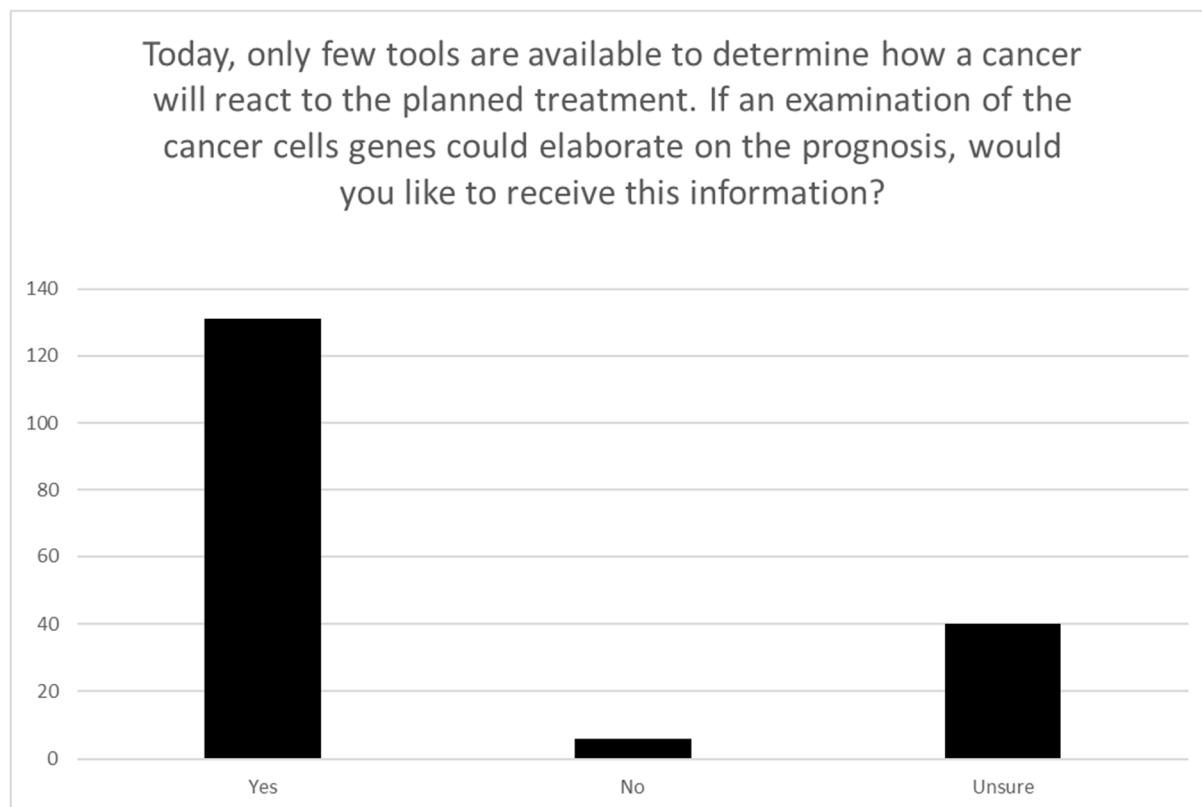

11)

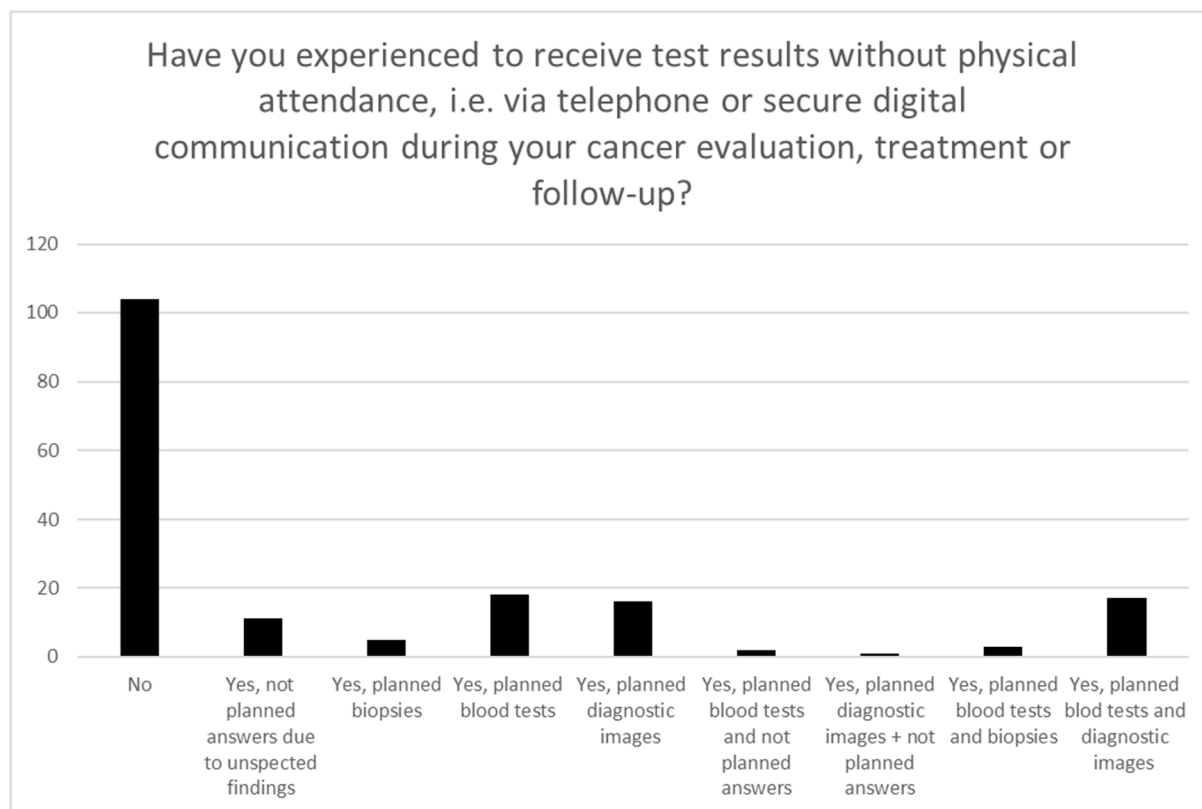

12)

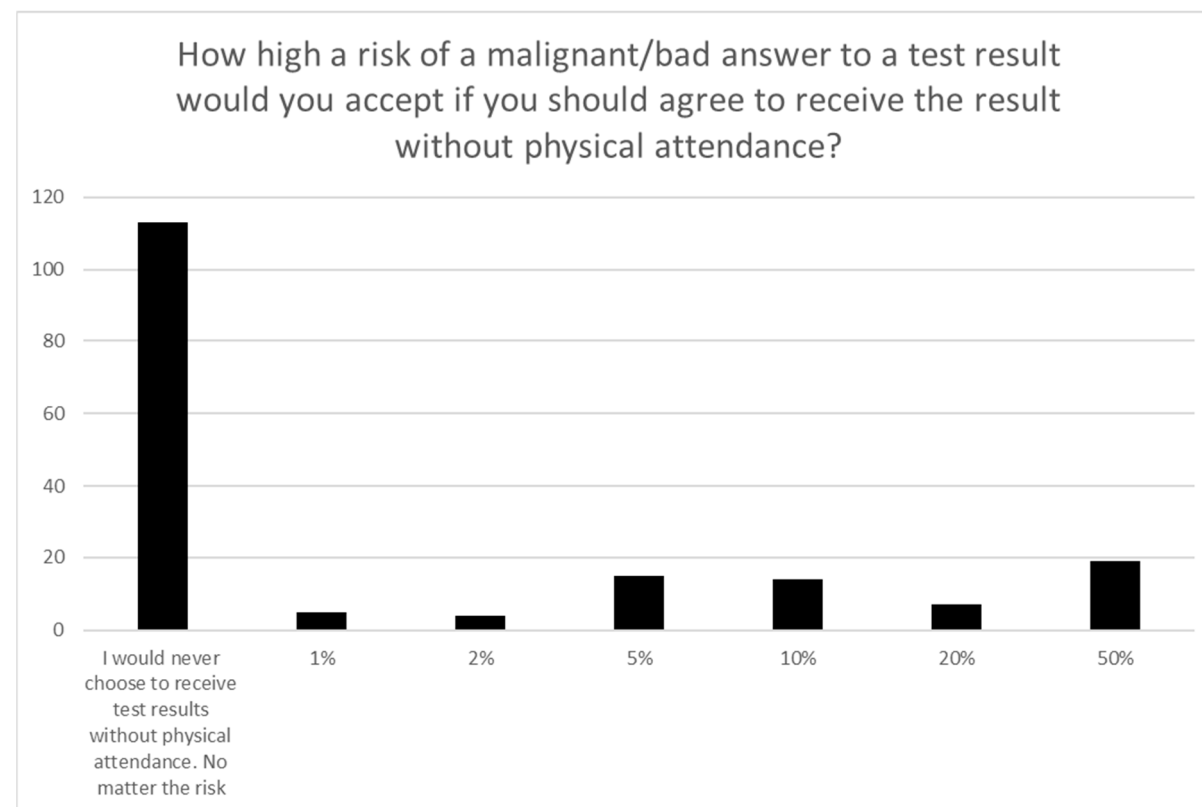

Supplement: s1 [file s1]
